# Supplementary material for: A Needs Assessment Survey: Staff Development/Continuing Education in the Kansas City Metropolitan Library Network.
Source: Royal Society of Chemistry journal article supplement (doi:10.1039/c9ra01501a), 1979-01-01
Supplement: c9ra01501a1.pdf [file c9ra01501a1.pdf]

## Supporting Information

# Using Magneto-electroluminescence as a Fingerprint to Identify the Spin Polarization and Spin-orbit Coupling of Magnetic Nanoparticle Doped Polymer Light Emitting Diodes

Weiyao Jia<sup>a,b,c</sup>, Tadaaki Ikoma<sup>c</sup>, Lixiang Chen<sup>a</sup>, Hongqiang Zhu<sup>a</sup>, Xiantong Tang<sup>a</sup>, Fenlan Qu<sup>a</sup> and Zuhong Xiong<sup>\*,a,b</sup>

Prof. Zuhong Xiong (E-mail: zhxiong@swu.edu.cn) & Dr. Weiyao Jia (E-mail: wyjia@swu.edu.cn)

a. *School of Physical Science and Technology, Southwest University, Chongqing 400715, People's Republic of China.*

b. *MOE Key Laboratory on Luminescence and Real-Time Analysis, Southwest University, Chongqing 400715, People's Republic of China.*

Prof. Tadaaki Ikoma (E-mail: ikoma@chem.sc.niigata-u.ac.jp) & Dr. Weiyao Jia (E-mail: wyjia@swu.edu.cn)

c. *Graduate School of Science and Technology, Niigata University, 2-8050 Ikarashi, Nishi-ku, Niigata 950-2181, Japan.*

Dr. Lixiang Chen, Dr. Hongqiang Zhu, MSC Xiantong Tang & MSC Fenlan Qu

a. *School of Physical Science and Technology, Southwest University, Chongqing 400715, People's Republic of China.*

## Supplementary Note:

### 1. Spin injection model

The spin polarization of metal magnetic nanomaterials promotes the conversion from triplet polaron pair ( $^3PP_{m=0,1}$ , precursor of the triplet exciton) to singlet polaron pair ( $^1PP_{m=0}$ , a precursor of singlet exciton) in PLEDs, which theoretically increases the  $R_{ST}$  from 1/3 to 1/2, as shown in scheme S1.

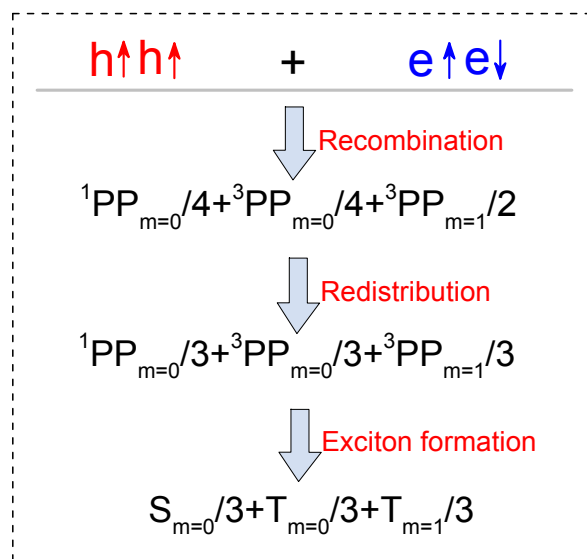

Scheme S1. Spin injection model.<sup>1,2</sup>

## 2. EDX Spectra Analysis of blend film

The analysis of SY-PPV/ Fe<sub>3</sub>O<sub>4</sub> blend film was performed using a TEM coupled with a JEOL-14053JGT energy-dispersive X-ray (EDX) spectroscopy detector operated at 200 kV.

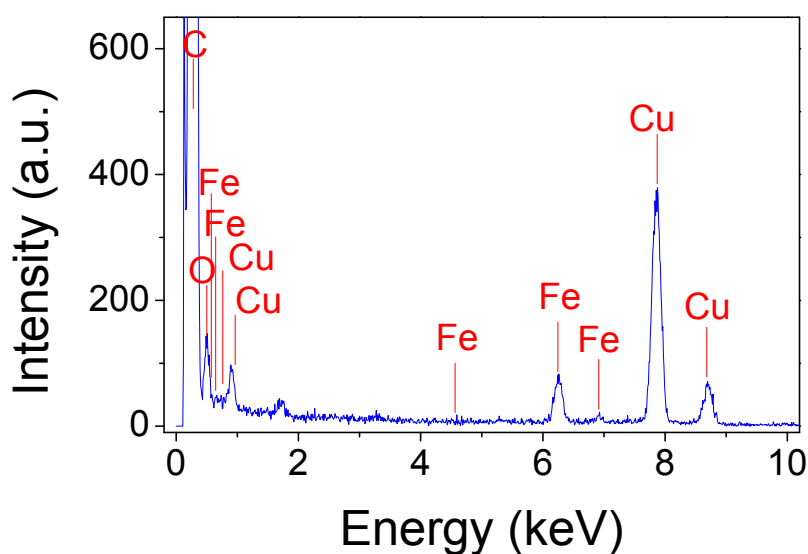

Fig.S1 EDX spectra of SY-PPV/ Fe<sub>3</sub>O<sub>4</sub> blend layer. Sample was placed on a copper TEM grid for examination. Peaks corresponding to Fe and O are evident. Cu signals are from copper grid supporting blend layer.

## 3. Information about Fe<sub>3</sub>O<sub>4</sub> nanoparticles

### 3.1 Transmission Electron Microscopy

The Fe<sub>3</sub>O<sub>4</sub> NPs (5 nm) had been dispersed in a toluene solution at a concentration of 10 mg/mL before they were bought from NaJing Technology corporation LTD (China). Some publications involve the company's magnetic nanoparticle products.<sup>3</sup> A Transmission Electron Microscopy (TEM) image of Fe<sub>3</sub>O<sub>4</sub> nanoparticles was provided by this company, as shown in Fig.S2.

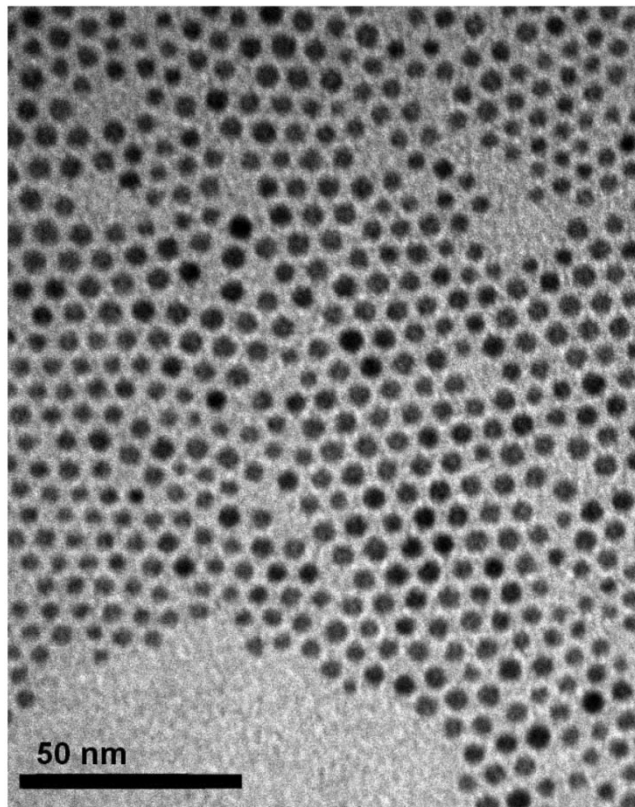

Fig.S2 TEM image of Fe<sub>3</sub>O<sub>4</sub> NPs in organic solvent provided by NaJing Technology Corporation LTD.

---

### 3.3 Raman Spectra Analysis

Raman spectrum has been proved as a useful technique to differentiate various iron oxide phase, especially between Fe<sub>3</sub>O<sub>4</sub> and  $\gamma$ -Fe<sub>2</sub>O<sub>3</sub>.<sup>4</sup> The film samples for Raman analysis were prepared by spincoating Fe<sub>3</sub>O<sub>4</sub> on SiO<sub>2</sub> substrates. The substrate was baked in a glove box at 60 °C for 10 minutes and then used again for spin-coating, which was repeated 5 times to make the sample film thick enough. After the sample preparation, the Raman spectra were measured immediately with a single 10 s accumulation at room temperature in a Raman spectrometer (Renishaw Invia Raman spectrometer, Invia, U.K.) with the equipment of a line ( $\lambda$ =532 nm) from a He-Ne laser (10 mW of power on the 50 X objective). The Raman spectrum was shown in Fig. S3. Three peaks at 319, 528

and  $661\text{ cm}^{-1}$  can be assigned to the  $T_{2g}$ ,  $E_g$  and  $A_{1g}$  modes of  $\text{Fe}_3\text{O}_4$ , respectively.<sup>5, 6</sup> A weak peak at  $470\text{ cm}^{-1}$  is assigned to magnon scattering of  $\text{Fe}_3\text{O}_4$ .<sup>6</sup> However, several additional weak peaks at 291, 413, and  $614\text{ cm}^{-1}$  were observed. Faria et. al. reported that intense laser excitation tend to decompose the  $\text{Fe}_3\text{O}_4$  into  $\text{Fe}_2\text{O}_3$  during the measurement of Raman spectrum.<sup>6</sup> We attributed these weak peaks to  $E_g$  modes of  $\alpha\text{-Fe}_2\text{O}_3$  because the laser power for our sample is above 7 mW (the signal-noise ratio is very low if the power drops below 7 mW).

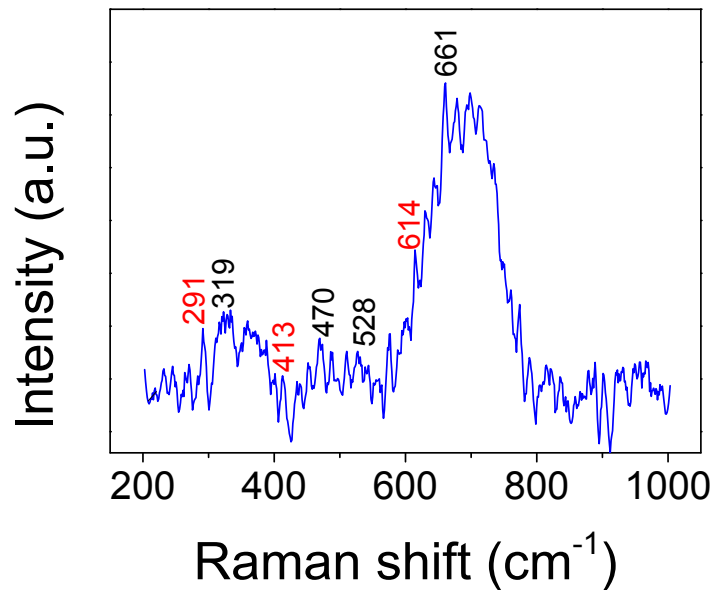

Fig.S3 Raman spectra (Renishaw Invia Raman spectrometer, Invia, U.K., resolution of  $1\text{cm}^{-1}$ ) of  $\text{Fe}_3\text{O}_4$  nanoparticles (in solid film) on a  $\text{SiO}_2$  substrate.

---

### 3.2 X-ray diffraction (XRD) pattern

To confirm the phase compositions of the sample of  $\text{Fe}_3\text{O}_4$  NPs, the X-ray diffraction (XRD) analysis was performed at room temperature on TD3500 (Tongda, resolution of  $0.02^\circ$ ) with  $\text{Cu K}\alpha$  radiation operated at 40 kV and 30 mA. The XRD patterns of sample were almost same to the reported diffraction peaks of polycrystalline  $\text{Fe}_3\text{O}_4$ ,<sup>1, 3</sup> as shown in Figure 3. This further confirmed that the weak Raman peaks of  $\alpha\text{-Fe}_2\text{O}_3$  are originated from sample decomposition due to the use of high-power laser excitation. After the film samples for XRD analysis were prepared (similar to Raman sample), the X-ray diffraction (XRD) analysis was performed at room temperature on TD3500 (Resolution of  $0.02^\circ$ , Tongda, China) with  $\text{Cu K}\alpha$  radiation operated at 40 kV and 30 mA. The XRD patterns of sample were shown in Fig.S4.

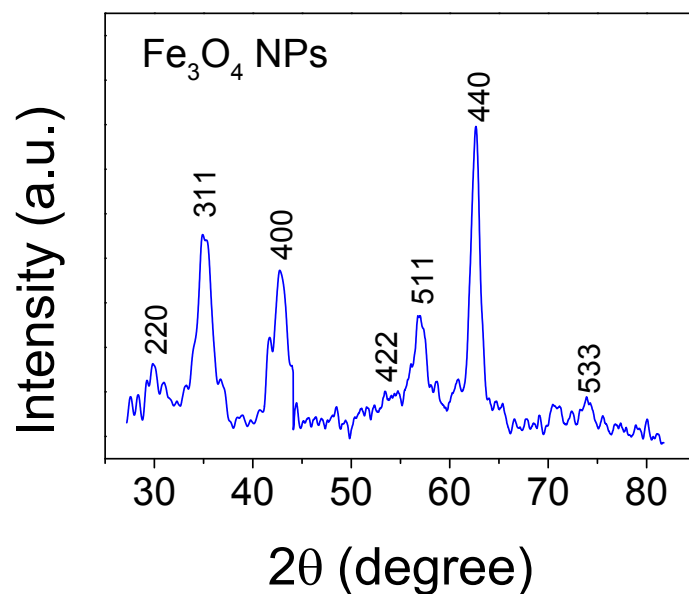

Fig.S4 XRD patterns of Fe<sub>3</sub>O<sub>4</sub> NPs. (XRD analysis: TD3500, Tongda, resolution of 0.02°)

---

#### References:

1. C.-J. Sun, Y. Wu, Z. Xu, B. Hu, J. Bai, J.-P. Wang and J. Shen, *Appl. Phys. Lett.*, 2007, **90**, 232110.
2. B. Hu, Y. Wu, Z. Zhang, S. Dai and J. Shen, *Appl. Phys. Lett.*, 2006, **88**, 022114.
3. H. Kong, K. Xia, N. Ren, Y. Cui, R. Liu, Q. Li, M. Lv, J. Shi, Q. Yan, Z. Cui, C. Fan, Y. Zhu and L. Wang, *Nanoscale*, 2018, **10**, 18055-18063.
4. H. Wu, G. Wu and L. Wang, *Powder Technol.*, 2015, **269**, 443-451.
5. J.-M. Li, A. C. H. Huan, L. Wang, Y.-W. Du and D. Feng, *Phys. Rev. B*, 2000, **61**, 6876-6878.
6. D. L. A. de Faria, S. Venâncio Silva and M. T. de Oliveira, *J. Raman Spectrosc.*, 1997, **28**, 873-878.
